# Supplementary material for: TiO2/Ti1−xSnxO2 heterojunction nanowires: characterization, formation, and gas sensing performance
Source: Royal Society of Chemistry journal article supplement (doi:10.1039/c1jm11772f), 2011-01-01
Supplement: c1jm11772f.pdf [file c1jm11772f.pdf]

## Supplementary Information

### TiO<sub>2</sub>/Ti<sub>1-x</sub>Sn<sub>x</sub>O<sub>2</sub> Heterojunction Nanowires: Characterization, Formation, and Gas Sensing Performance

Jyh Ming Wu

Department of Material Science and Engineering, Feng Chia University, 100  
Wenhwa Rd., Seatwen, Taichung 40724, Taiwan.

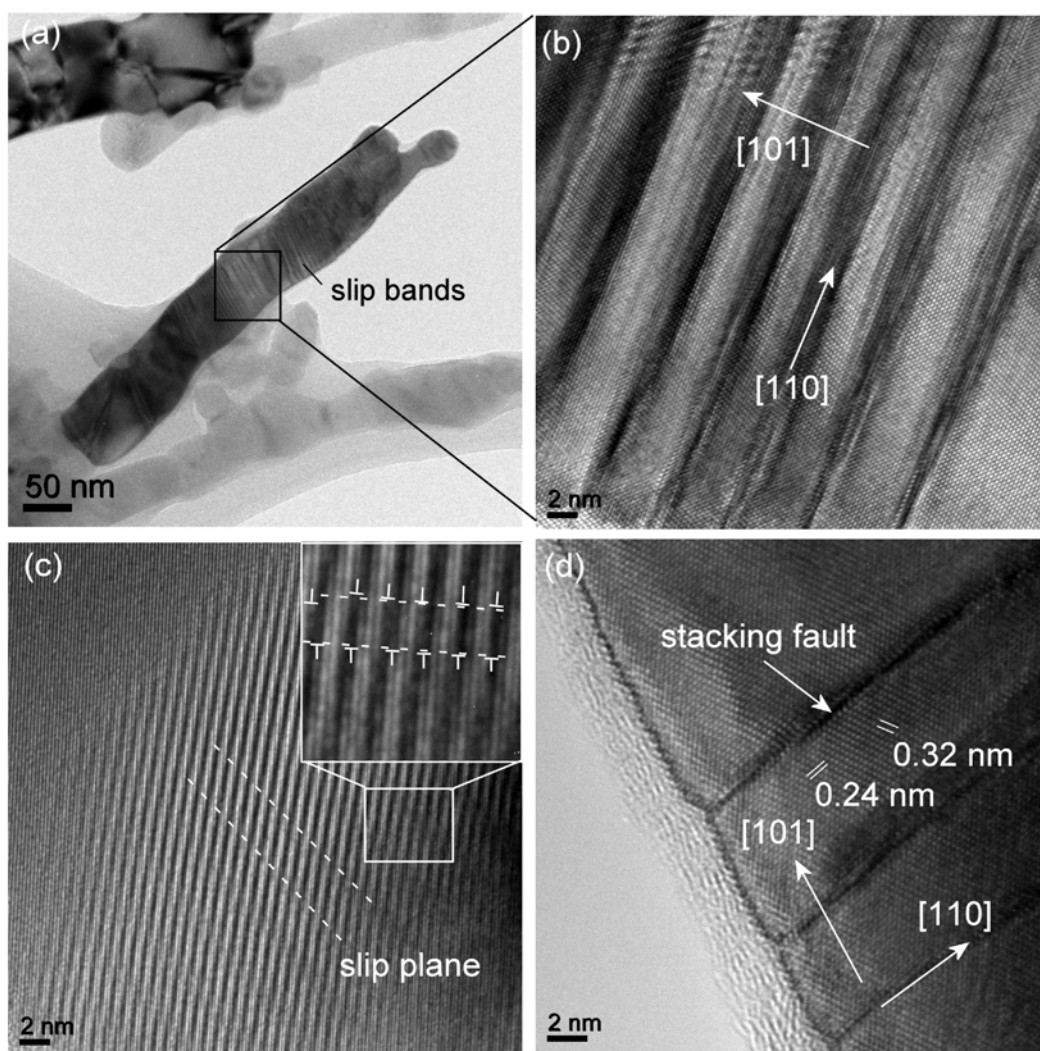

Figure S1 (a) Low magnification heterojunction nanowire. (b) HRTEM image showing stacking faults (110) with a number of slip bands. (c) Low energy dislocation structures (LEDS) of Taylor lattice, forming by a number of dislocations. (d) Stacking faults with (110) plane in TiO<sub>2</sub> nanowires.
